# Supplementary material for: Premorbid Sociodemographic Status and Multiple Sclerosis Outcomes in a Universal Health Care Context
Source: PubMed Central journal article supplement — JAMA Netw Open. 2023 Sep 26;6(9):e2334675. doi: 10.1001/jamanetworkopen.2023.34675 (PMC10523174; doi:10.1001/jamanetworkopen.2023.34675), 2023-09-26
Supplement: jamanetwopen-e2334675-s001.pdf [file jamanetwopen-e2334675-s001.pdf]

## Supplemental Online Content

He A, Manouchehrinia A, Glaser A, et al. Premorbid sociodemographic status and multiple sclerosis outcomes in a universal health care context. *JAMA Netw Open*. 2023;6(9):e2334675. doi:10.1001/jamanetworkopen.2023.34675

**eTable 1.** Effect of 1-Year Premorbid Socioeconomic Status on EDSS and MSIS

**eTable 2.** Effect of 5-Year Premorbid Socioeconomic Status on EDSS and MSIS

**eTable 3.** Effect of 1-Year Premorbid Socioeconomic Status on EDSS and MSIS, Adjusted for Comorbidity

**eTable 4.** Estimated Effect of 1-Year Premorbid Sociodemographic Factors on Multiple Sclerosis Severity, Unadjusted Analyses

**eTable 5.** Estimated Effect of 5-Year Premorbid Sociodemographic Factors on Multiple Sclerosis Severity, Unadjusted Analyses

This supplemental material has been provided by the authors to give readers additional information about their work.

Supplementary material 1: Full model estimates, main model

**eTable 1. Effect of 1-Year Premorbid Socioeconomic Status on EDSS and MSIS**

| Relapsing onset                                                   | EDSS  |       |       |        | MSIS physical    |       |       |        | MSIS psychological |       |       |        |
|-------------------------------------------------------------------|-------|-------|-------|--------|------------------|-------|-------|--------|--------------------|-------|-------|--------|
|                                                                   | Est   | LL    | UL    | p      | Est <sup>‡</sup> | LL    | UL    | p      | Est <sup>‡</sup>   | LL    | UL    | p      |
| (Intercept)                                                       | 2.21  | 2.07  | 2.36  | <0.001 | 25.13            | 21.53 | 29.34 | <0.001 | 44.92              | 39.54 | 51.04 | <0.001 |
| Male sex                                                          | 0.15  | 0.05  | 0.24  | 0.002  | 0.83             | 0.75  | 0.92  | 0.001  | 0.83               | 0.76  | 0.90  | <0.001 |
| Age at onset (years)                                              | 0.04  | 0.03  | 0.04  | <0.001 | 1.02             | 1.02  | 1.03  | <0.001 | 1.00               | 1.00  | 1.01  | 0.39   |
| Disease duration (years)                                          | 0.06  | 0.05  | 0.06  | <0.001 | 1.01             | 1.00  | 1.02  | <0.001 | 0.98               | 0.98  | 0.99  | <0.001 |
| Number of early relapses                                          | 0.11  | 0.07  | 0.15  | <0.001 | 1.05             | 1.01  | 1.09  | 0.02   | 1.03               | 1.00  | 1.07  | 0.05   |
| Proportion of disease time on high-efficacy therapy <sup>§</sup>  | -0.04 | -0.05 | -0.04 | <0.001 | 0.94             | 0.94  | 0.95  | <0.001 | 0.95               | 0.94  | 0.96  | <0.001 |
| Proportion of disease time on lower-efficacy therapy <sup>§</sup> | -0.03 | -0.03 | -0.03 | <0.001 | 0.96             | 0.95  | 0.96  | <0.001 | 0.96               | 0.95  | 0.96  | <0.001 |
| Income quartile                                                   | -0.16 | -0.20 | -0.12 | <0.001 | 0.86             | 0.82  | 0.89  | <0.001 | 0.88               | 0.84  | 0.91  | <0.001 |
| Secondary education*                                              | -0.30 | -0.40 | -0.19 | <0.001 | 0.82             | 0.73  | 0.92  | 0.001  | 0.92               | 0.84  | 1.01  | 0.09   |
| Tertiary education*                                               | -0.47 | -0.59 | -0.35 | <0.001 | 0.57             | 0.50  | 0.65  | <0.001 | 0.75               | 0.67  | 0.83  | <0.001 |
| Partnered <sup>#</sup>                                            | -0.04 | -0.14 | 0.05  | 0.38   | 1.00             | 0.90  | 1.11  | 0.99   | 1.00               | 0.91  | 1.09  | 0.94   |
| Separated <sup>#</sup>                                            | 0.34  | 0.18  | 0.51  | <0.001 | 1.35             | 1.12  | 1.62  | 0.002  | 1.25               | 1.08  | 1.46  | 0.004  |
| Progressive onset                                                 | EDSS  |       |       |        | MSIS physical    |       |       |        | MSIS psychological |       |       |        |
|                                                                   | Est   | LL    | UL    | P      | Est              | LL    | UL    | P      | Est                | LL    | UL    | P      |
| (Intercept)                                                       | 3.63  | 3.01  | 4.26  | <0.001 | 36.89            | 22.67 | 60.05 | <0.001 | 42.26              | 25.87 | 69.02 | <0.001 |
| Male sex                                                          | 0.14  | -0.27 | 0.54  | 0.51   | 0.93             | 0.70  | 1.25  | 0.64   | 0.81               | 0.61  | 1.09  | 0.16   |
| Age at onset                                                      | 0.03  | 0.00  | 0.05  | 0.04   | 1.00             | 0.98  | 1.02  | 0.93   | 0.99               | 0.98  | 1.01  | 0.54   |
| Disease duration                                                  | 0.22  | 0.21  | 0.24  | <0.001 | 1.04             | 1.02  | 1.06  | <0.001 | 1.01               | 0.99  | 1.03  | 0.41   |
| Income quartile                                                   | -0.30 | -0.48 | -0.11 | 0.002  | 0.98             | 0.85  | 1.12  | 0.72   | 0.96               | 0.84  | 1.10  | 0.58   |
| Secondary education*                                              | -0.26 | -0.72 | 0.20  | 0.26   | 0.66             | 0.47  | 0.93  | 0.02   | 0.71               | 0.51  | 1.00  | 0.05   |
| Tertiary education*                                               | -0.25 | -0.80 | 0.30  | 0.37   | 0.69             | 0.47  | 1.03  | 0.07   | 0.67               | 0.46  | 0.99  | 0.05   |
| Partnered <sup>#</sup>                                            | -0.21 | -0.66 | 0.23  | 0.35   | 1.01             | 0.74  | 1.39  | 0.93   | 1.07               | 0.79  | 1.46  | 0.65   |
| Separated <sup>#</sup>                                            | -0.05 | -0.68 | 0.58  | 0.88   | 1.14             | 0.71  | 1.85  | 0.59   | 1.28               | 0.80  | 2.05  | 0.31   |

§ Estimates are for every additional 10% of disease time spent treated.

\* reference group: did not complete secondary education

# reference group: Unmarried

‡ Estimates are multiplicative of reference value; estimates <1 indicate lower symptom burden, >1 indicate higher symptom burden

**eTable 2. Effect of 5-Year Premorbid Socioeconomic Status on EDSS and MSIS**

|                                                                   | EDSS  |       |       |        | MSIS physical    |       |       |        | MSIS psychological |       |       |        |
|-------------------------------------------------------------------|-------|-------|-------|--------|------------------|-------|-------|--------|--------------------|-------|-------|--------|
|                                                                   | Est   | LL    | UL    | p      | Est <sup>⌘</sup> | LL    | UL    | p      | Est <sup>⌘</sup>   | LL    | UL    | p      |
| <b>Relapsing onset</b>                                            |       |       |       |        |                  |       |       |        |                    |       |       |        |
| (Intercept)                                                       | 2.03  | 1.87  | 2.20  | <0.001 | 22.35            | 18.89 | 26.44 | <0.001 | 41.67              | 36.23 | 47.94 | <0.001 |
| Male sex                                                          | 0.20  | 0.09  | 0.30  | <0.001 | 0.84             | 0.75  | 0.94  | 0.003  | 0.83               | 0.76  | 0.91  | <0.001 |
| Age at onset                                                      | 0.05  | 0.04  | 0.05  | <0.001 | 1.03             | 1.02  | 1.04  | <0.001 | 1.00               | 0.99  | 1.01  | 0.746  |
| Disease duration                                                  | 0.06  | 0.06  | 0.07  | <0.001 | 1.01             | 1.01  | 1.02  | <0.001 | 0.98               | 0.98  | 0.99  | <0.001 |
| Number of early relapses                                          | 0.10  | 0.06  | 0.14  | <0.001 | 1.04             | 1.00  | 1.09  | 0.068  | 1.03               | 0.99  | 1.07  | 0.139  |
| Proportion of disease time on high-efficacy therapy <sup>§</sup>  | -0.03 | -0.04 | -0.02 | <0.001 | 0.94             | 0.94  | 0.95  | <0.001 | 0.95               | 0.94  | 0.96  | <0.001 |
| Proportion of disease time on lower-efficacy therapy <sup>§</sup> | -0.03 | -0.03 | -0.03 | <0.001 | 0.96             | 0.95  | 0.97  | <0.001 | 0.96               | 0.95  | 0.96  | <0.001 |
| Income quartile                                                   | -0.12 | -0.17 | -0.08 | <0.001 | 0.87             | 0.83  | 0.91  | <0.001 | 0.90               | 0.87  | 0.94  | <0.001 |
| Secondary education*                                              | -0.29 | -0.41 | -0.18 | <0.001 | 0.79             | 0.70  | 0.90  | <0.001 | 0.87               | 0.79  | 0.97  | 0.010  |
| Tertiary education*                                               | -0.50 | -0.63 | -0.37 | <0.001 | 0.57             | 0.50  | 0.66  | <0.001 | 0.71               | 0.63  | 0.80  | <0.001 |
| Partnered <sup>#</sup>                                            | -0.02 | -0.13 | 0.09  | 0.740  | 1.06             | 0.94  | 1.19  | 0.335  | 1.03               | 0.94  | 1.14  | 0.519  |
| Separated <sup>#</sup>                                            | 0.29  | 0.09  | 0.49  | 0.005  | 1.44             | 1.15  | 1.80  | 0.001  | 1.24               | 1.03  | 1.49  | 0.022  |
|                                                                   | EDSS  |       |       |        | MSIS physical    |       |       |        | MSIS psychological |       |       |        |
| <b>Progressive onset</b>                                          |       |       |       |        |                  |       |       |        |                    |       |       |        |
| (Intercept)                                                       | 3.21  | 2.60  | 3.82  | <0.001 | 42.81            | 26.07 | 70.29 | <0.001 | 49.48              | 30.07 | 81.40 | <0.001 |
| Male sex                                                          | 0.09  | -0.31 | 0.49  | 0.658  | 0.86             | 0.64  | 1.15  | 0.300  | 0.79               | 0.59  | 1.05  | 0.103  |
| Age at onset                                                      | 0.04  | 0.01  | 0.06  | 0.008  | 1.01             | 0.99  | 1.03  | 0.601  | 1.00               | 0.98  | 1.02  | 0.955  |
| Disease duration                                                  | 0.22  | 0.21  | 0.24  | <0.001 | 1.04             | 1.01  | 1.06  | 0.001  | 1.00               | 0.98  | 1.03  | 0.691  |
| Income quartile                                                   | -0.13 | -0.31 | 0.06  | 0.175  | 0.93             | 0.81  | 1.06  | 0.279  | 0.91               | 0.80  | 1.04  | 0.150  |
| Secondary education*                                              | -0.33 | -0.77 | 0.11  | 0.147  | 0.72             | 0.52  | 1.00  | 0.047  | 0.77               | 0.56  | 1.07  | 0.118  |
| Tertiary education*                                               | -0.29 | -0.86 | 0.28  | 0.316  | 0.78             | 0.52  | 1.19  | 0.249  | 0.69               | 0.46  | 1.04  | 0.077  |
| Partnered <sup>#</sup>                                            | -0.30 | -0.74 | 0.13  | 0.173  | 0.93             | 0.68  | 1.27  | 0.668  | 0.97               | 0.72  | 1.32  | 0.847  |
| Separated <sup>#</sup>                                            | -0.09 | -0.74 | 0.55  | 0.776  | 1.00             | 0.62  | 1.61  | 1.000  | 1.19               | 0.74  | 1.90  | 0.470  |

§ Estimates are for every additional 10% of disease time spent treated.

\* reference group: did not complete secondary education

# reference group: unmarried

⌘ Estimates are multiplicative of reference value; estimates <1 indicate lower symptom burden, >1 indicate higher symptom burden

Supplementary material 2: Patient baseline characteristics five years prior to multiple sclerosis onset

|                                                                   | EDSS analysis     |               | MSIS-29 analysis  |               |
|-------------------------------------------------------------------|-------------------|---------------|-------------------|---------------|
|                                                                   | Progressive onset | Relapse onset | Progressive onset | Relapse onset |
| n                                                                 | 362               | 3394          | 190               | 2899          |
| Age at onset (mean (SD))                                          | 47.67 (8.40)      | 39.56 (8.22)  | 45.38 (7.96)      | 38.92 (7.90)  |
| Male sex, n (%)                                                   | 171 (47.2)        | 1026 (30.2)   | 91 (47.9)         | 878 (30.3)    |
| Female sex, n (%)                                                 | 191 (52.8)        | 2368 (69.8)   | 99 (52.1)         | 2021 (69.7)   |
| Income Quartile, n(%)                                             |                   |               |                   |               |
| 1 (least affluent)                                                | 71 (20.0)         | 706 (21.9)    | 37 (19.8)         | 595 (21.6)    |
| 2                                                                 | 56 (15.8)         | 778 (24.2)    | 37 (19.8)         | 673 (24.4)    |
| 3                                                                 | 103 (29.0)        | 840 (26.1)    | 52 (27.8)         | 716 (26.0)    |
| 4 (most affluent)                                                 | 125 (35.2)        | 896 (27.8)    | 61 (32.6)         | 775 (28.1)    |
| Marital status, n (%)                                             |                   |               |                   |               |
| Single                                                            | 155 (43.7)        | 1877 (58.3)   | 88 (47.1)         | 1654 (59.9)   |
| Partnered                                                         | 151 (42.5)        | 1121 (34.8)   | 76 (40.6)         | 931 (33.7)    |
| Separated                                                         | 49 (13.8)         | 222 (6.9)     | 23 (12.3)         | 174 (6.3)     |
| Highest educational attainment, n (%)                             |                   |               |                   |               |
| Pre-secondary                                                     | 171 (48.4)        | 1045 (32.6)   | 77 (41.4)         | 860 (31.3)    |
| Secondary education                                               | 125 (35.4)        | 1364 (42.5)   | 77 (41.4)         | 1179 (42.9)   |
| Tertiary                                                          | 57 (16.1)         | 799 (24.9)    | 32 (17.2)         | 712 (25.9)    |
| Charlson comorbidity index (%)                                    |                   |               |                   |               |
| 0                                                                 | 261 (91.6)        | 2559 (94.0)   | 149 (95.5)        | 2205 (93.9)   |
| >1                                                                | 24 (8.4)          | 162 (5.9)     | 7 (4.5)           | 144 (6.1)     |
| Number of EDSS scores recorded during follow-up (median [IQR])    | 4 [2-7]           | 6 [4-9]       |                   |               |
| Number of MSIS-29 scores recorded during follow-up (median [IQR]) |                   |               | 2 [1-4]           | 5 [3-7]       |
| Follow-up time (mean (SD))                                        | 8.29 (3.35)       | 8.17 (3.42)   | 7.30 (3.18)       | 8.03 (3.37)   |

EDSS: Expanded disability status scale score.

MSIS-29: Multiple sclerosis impact scale score.

Supplementary material 3: Secondary analysis adjusted for comorbidity

**eTable 3. Effect of 1-Year Premorbid Socioeconomic Status on EDSS and MSIS, Adjusted for Comorbidity**

| Relapsing onset                                                   | EDSS  |       |       |        | MSIS physical    |       |       |        | MSIS psychological |       |       |        |
|-------------------------------------------------------------------|-------|-------|-------|--------|------------------|-------|-------|--------|--------------------|-------|-------|--------|
|                                                                   | Est   | LL    | UL    | p      | Est <sup>a</sup> | LL    | UL    | p      | Est <sup>a</sup>   | LL    | UL    | p      |
| (Intercept)                                                       | 2.26  | 2.10  | 2.41  | <0.001 | 27.64            | 23.39 | 32.65 | <0.001 | 47.09              | 41.07 | 53.98 | <0.001 |
| Male sex                                                          | 0.16  | 0.05  | 0.27  | 0.004  | 0.86             | 0.76  | 0.96  | 0.009  | 0.89               | 0.81  | 0.98  | 0.017  |
| Age at onset                                                      | 0.04  | 0.03  | 0.04  | <0.001 | 1.02             | 1.02  | 1.03  | <0.001 | 1.00               | 1.00  | 1.01  | 0.17   |
| Disease duration                                                  | 0.06  | 0.06  | 0.07  | <0.001 | 1.01             | 1.00  | 1.01  | 0.001  | 0.98               | 0.98  | 0.99  | <0.001 |
| Number of early relapses                                          | 0.11  | 0.07  | 0.15  | <0.001 | 1.05             | 1.00  | 1.09  | 0.04   | 1.04               | 1.01  | 1.08  | 0.02   |
| Proportion of disease time on high-efficacy therapy <sup>§</sup>  | -0.04 | -0.05 | -0.04 | <0.001 | 0.95             | 0.94  | 0.96  | <0.001 | 0.95               | 0.94  | 0.96  | <0.001 |
| Proportion of disease time on lower-efficacy therapy <sup>§</sup> | -0.03 | -0.03 | -0.02 | <0.001 | 0.96             | 0.95  | 0.96  | <0.001 | 0.96               | 0.95  | 0.96  | <0.001 |
| Income quartile                                                   | -0.18 | -0.22 | -0.13 | <0.001 | 0.83             | 0.79  | 0.87  | <0.001 | 0.86               | 0.83  | 0.89  | <0.001 |
| Secondary education*                                              | -0.34 | -0.46 | -0.22 | <0.001 | 0.79             | 0.70  | 0.90  | <0.001 | 0.91               | 0.82  | 1.01  | 0.06   |
| Tertiary education*                                               | -0.47 | -0.60 | -0.34 | <0.001 | 0.58             | 0.50  | 0.66  | <0.001 | 0.75               | 0.67  | 0.84  | <0.001 |
| Partnered <sup>#</sup>                                            | -0.03 | -0.13 | 0.08  | 0.638  | 1.00             | 0.89  | 1.12  | 0.97   | 1.02               | 0.93  | 1.12  | 0.70   |
| Separated <sup>#</sup>                                            | 0.35  | 0.16  | 0.53  | <0.001 | 1.34             | 1.10  | 1.63  | 0.004  | 1.24               | 1.06  | 1.46  | 0.008  |
| Comorbidity index >1                                              | 0.38  | 0.17  | 0.58  | <0.001 | 1.34             | 1.08  | 1.66  | 0.008  | 1.16               | 0.97  | 1.38  | 0.10   |

| Progressive onset    | EDSS  |       |       |        | MSIS physical    |      |      |        | MSIS psychological |      |      |        |
|----------------------|-------|-------|-------|--------|------------------|------|------|--------|--------------------|------|------|--------|
|                      | Est   | LL    | UL    | p      | Est <sup>‡</sup> | LL   | UL   | p      | Est <sup>‡</sup>   | LL   | UL   | p      |
| (Intercept)          | 2.94  | 2.07  | 3.81  | <0.001 | 34.5             | 20.2 | 58.8 | <0.001 | 43.0               | 26.6 | 69.5 | <0.001 |
| Male sex             | 0.29  | -0.17 | 0.75  | 0.21   | 0.87             | 0.62 | 1.21 | 0.41   | 0.78               | 0.58 | 1.05 | 0.10   |
| Age at onset         | 0.03  | 0.00  | 0.06  | 0.02   | 1.01             | 0.99 | 1.03 | 0.38   | 1.00               | 0.98 | 1.02 | 0.95   |
| Disease duration     | 0.21  | 0.20  | 0.23  | <0.001 | 1.04             | 1.02 | 1.06 | <0.001 | 1.01               | 0.98 | 1.03 | 0.64   |
| Income quartile      | -0.28 | -0.49 | -0.07 | 0.009  | 0.98             | 0.84 | 1.15 | 0.83   | 0.96               | 0.84 | 1.10 | 0.56   |
| Secondary education* | -0.06 | -0.57 | 0.46  | 0.83   | 0.73             | 0.49 | 1.07 | 0.11   | 0.83               | 0.59 | 1.17 | 0.30   |
| Tertiary education*  | -0.26 | -0.89 | 0.36  | 0.41   | 0.63             | 0.41 | 0.99 | 0.047  | 0.66               | 0.44 | 0.98 | 0.04   |
| Partnered#           | -0.25 | -0.75 | 0.26  | 0.33   | 1.05             | 0.73 | 1.50 | 0.81   | 1.05               | 0.76 | 1.44 | 0.78   |
| Separated#           | -0.09 | -0.79 | 0.61  | 0.80   | 1.11             | 0.64 | 1.91 | 0.71   | 1.27               | 0.78 | 2.05 | 0.34   |
| Comorbidity index >1 | 0.90  | 0.08  | 1.73  | 0.03   | 0.82             | 0.37 | 1.78 | 0.61   | 1.00               | 0.50 | 2.00 | 1.00   |

§ Estimates are for every additional 10% of disease time spent treated.

\* reference group: did not complete secondary education

# reference group: Unmarried

‡ Estimates are multiplicative of reference value; estimates <1 indicate lower symptom burden, >1 indicate higher symptom burden

Supplementary material 4: Unadjusted analyses of individual sociodemographic factors

**eTable 4: Estimated Effect of 1 Year Premorbid Sociodemographic Factors on Multiple Sclerosis Severity, Unadjusted Analyses**

| Relapse onset          | EDSS     |               |        | MSIS-29 Physical symptoms |             |        | MSIS-29 Psychological symptoms |             |        |
|------------------------|----------|---------------|--------|---------------------------|-------------|--------|--------------------------------|-------------|--------|
|                        | Estimate | 95% CI        | p      | Estimate                  | 95% CI      | p      | Estimate                       | 95% CI      | p      |
| Income quartile        | -0.10    | -0.14 - -0.06 | <0.001 | 0.85                      | 0.82 – 0.89 | <0.000 | 0.85                           | 0.85 – 0.85 | <0.001 |
| Educational attainment |          |               |        |                           |             |        |                                |             |        |
| Secondary              | -0.53    | -0.64 - -0.43 | <0.001 | 0.71                      | 0.63 – 0.79 | <0.001 | 0.90                           | 0.82 – 0.99 | 0.03   |
| Tertiary               | -0.73    | -0.85 - -0.62 | <0.001 | 0.49                      | 0.43 – 0.55 | <0.001 | 0.71                           | 0.64 – 0.78 | <0.001 |
| Marital status         |          |               |        |                           |             |        |                                |             |        |
| Partnered              | 0.16     | 0.07 - 0.25   | <0.001 | 0.95                      | 0.85 – 1.05 | 0.31   | 0.96                           | 0.88 – 1.04 | 0.32   |
| Separated              | 0.70     | 0.53 - 0.86   | <0.001 | 1.43                      | 1.18 – 1.73 | <0.001 | 1.30                           | 1.12 – 1.52 | 0.001  |

| Progressive onset      | EDSS     |               |       | MSIS-29 Physical symptoms |             |      | MSIS-29 Psychological symptoms |             |        |
|------------------------|----------|---------------|-------|---------------------------|-------------|------|--------------------------------|-------------|--------|
|                        | Estimate | 95% CI        | p     | Estimate                  | 95% CI      | p    | Estimate                       | 95% CI      | P      |
| Income quartile        | -0.25    | -0.43 - -0.07 | 0.007 | 1.00                      | 0.88 – 1.14 | 0.99 | 0.95                           | 0.84 – 1.09 | 0.48   |
| Educational attainment |          |               |       |                           |             |      |                                |             |        |
| Secondary              | -0.40    | -0.86 - 0.06  | 0.09  | 0.67                      | 0.48 – 0.92 | 0.02 | 0.77                           | 0.76 – 0.77 | <0.001 |
| Tertiary               | -0.49    | -1.04 - 0.06  | 0.08  | 0.69                      | 0.47 – 1.01 | 0.06 | 0.69                           | 0.69 – 0.69 | <0.001 |
| Marital status         |          |               |       |                           |             |      |                                |             |        |
| Partnered              | -0.33    | -0.77 - 0.11  | 0.14  | 0.95                      | 0.69 – 1.31 | 0.75 | 1.02                           | 0.75 – 1.39 | 0.91   |
| Separated              | 0.20     | -0.43 - 0.83  | 0.53  | 1.15                      | 0.70 – 1.90 | 0.57 | 1.32                           | 0.81 – 2.13 | 0.26   |

Linear mixed models with patient ID and calendar year of onset as random intercepts.

EDSS estimates are linear (additive). Estimates >0 indicate higher disability severity.

MSIS-29 estimates are coefficients (multiplicative). Estimates >1 indicate higher symptom severity.

**eTable 5. Estimated Effect of 5 Year Premorbid Sociodemographic Factors on Multiple Sclerosis Severity, Unadjusted Analyses**

| <b>Relapse onset</b>          | <b>EDSS</b> |               |        | <b>MSIS-29 Physical symptoms</b> |             |        | <b>MSIS-29 Psychological symptoms</b> |             |        |
|-------------------------------|-------------|---------------|--------|----------------------------------|-------------|--------|---------------------------------------|-------------|--------|
|                               | Estimate    | 95% CI        | p      | Estimate                         | 95% CI      | P      | Estimate                              | 95% CI      | P      |
| Income quartile               | -0.13       | -0.18 - -0.09 | <0.001 | 0.88                             | 0.84 – 0.92 | <0.001 | 0.88                                  | 0.85 – 0.92 | <0.001 |
| <b>Educational attainment</b> |             |               |        |                                  |             |        |                                       |             |        |
| Secondary                     | -0.52       | -0.64 - -0.41 | <0.001 | 0.68                             | 0.61 – 0.77 | <0.001 | 0.88                                  | 0.79 – 0.97 | 0.01   |
| Tertiary                      | -0.73       | -0.87 - -0.60 | <0.001 | 0.49                             | 0.43 – 0.56 | <0.001 | 0.70                                  | 0.63 – 0.79 | <0.001 |
| <b>Marital status</b>         |             |               |        |                                  |             |        |                                       |             |        |
| Partnered                     | 0.23        | 0.12 - 0.34   | <0.001 | 1.03                             | 0.92 – 1.16 | 0.62   | 1.01                                  | 1.00 – 1.01 | <0.001 |
| Separated                     | 0.75        | 0.55 - 0.95   | <0.001 | 1.55                             | 1.24 – 1.94 | <0.001 | 1.31                                  | 1.31 – 1.32 | <0.001 |

| <b>Progressive onset</b>      | <b>EDSS</b> |               |      | <b>MSIS-29 Physical symptoms</b> |             |      | <b>MSIS-29 Psychological symptoms</b> |             |        |
|-------------------------------|-------------|---------------|------|----------------------------------|-------------|------|---------------------------------------|-------------|--------|
|                               | Estimate    | 95% CI        | p    | Estimate                         | 95% CI      | p    | Estimate                              | 95% CI      | p      |
| Income quartile               | -0.22       | -0.40 - -0.05 | 0.01 | 0.94                             | 0.83 – 1.08 | 0.38 | 0.90                                  | 0.79 – 1.02 | 0.09   |
| <b>Educational attainment</b> |             |               |      |                                  |             |      |                                       |             |        |
| Secondary                     | -0.52       | -0.96 - -0.09 | 0.02 | 0.72                             | 0.53 – 0.98 | 0.04 | 0.81                                  | 0.80 – 0.81 | <0.001 |
| Tertiary                      | -0.53       | -1.09 - 0.03  | 0.07 | 0.76                             | 0.50 – 1.15 | 0.20 | 0.66                                  | 0.66 – 0.67 | <0.001 |
| <b>Marital status</b>         |             |               |      |                                  |             |      |                                       |             |        |
| Partnered                     | -0.19       | -0.61 - 0.23  | 0.38 | 0.92                             | 0.67 – 1.26 | 0.59 | 0.95                                  | 0.70 – 1.30 | 0.75   |
| Separated                     | 0.30        | -0.32 - 0.91  | 0.35 | 1.02                             | 0.62 – 1.68 | 0.94 | 1.25                                  | 0.77 – 2.03 | 0.36   |

Linear mixed models with patient ID and calendar year of onset as random intercepts.

EDSS estimates are linear (additive). Estimates >0 indicate higher disability severity.

MSIS-29 estimates are coefficients (multiplicative). Estimates >1 indicate higher symptom severity.
