# Supplementary material for: Premorbid Sociodemographic Status and Multiple Sclerosis Outcomes in a Universal Health Care Context
Source: PubMed Central journal article supplement — JAMA Netw Open. 2023 Sep 26;6(9):e2334675. doi: 10.1001/jamanetworkopen.2023.34675 (PMC10523174; doi:10.1001/jamanetworkopen.2023.34675), 2023-09-26
Supplement: jamanetwopen-e2334675-s002.pdf [file jamanetwopen-e2334675-s002.pdf]

## Data Sharing Statement

He. Premorbid Sociodemographic Status and Multiple Sclerosis Outcomes in a Universal Health Care Context. *JAMA Netw Open*. Published September 20, 2023.

doi:10.1001/jamanetworkopen.2023.34675

### Data

**Data available:** No

### Additional Information

**Explanation for why data not available:** Data from the Swedish Multiple Sclerosis registry and linked national registries can be made available to researchers with ethical permissions to access that data for the specified purposes.
